# Supplementary material for: Behavioral Correlates of Primates Conservation Status: Intrinsic Vulnerability to Anthropogenic Threats
Source: PubMed Central journal article supplement (PMC4596868; doi:10.1371/journal.pone.0135585), 2015-10-07
Supplement: pone.0135585.s001.pdf [file pone.0135585.s001.pdf]

|                                | Estimate | p-v    |
|--------------------------------|----------|--------|
| (Intercept)                    | -0.8448  | 0.4735 |
| <b>Extrinsic factors</b>       |          |        |
| Mean human footprint           | 0.0564   | 0.0003 |
| <b>Intrinsic Factors</b>       |          |        |
| <u>Ecology</u>                 |          |        |
| Annual range of precipitations | -0.0002  | 0.0003 |
| Mean temperature range         | -0.0054  | 0.0309 |
| Frugivory                      | 0.0151   | 0.0058 |
| Home range (log)               | 0.2171   | 0.0460 |
| <u>Life history</u>            |          |        |
| Gestation                      | 0.0138   | 0.0286 |
| Female body mass (res)         | 0.3872   | 0.0761 |
| <u>Behaviour</u>               |          |        |
| Mean group size (log)          | -0.4166  | 0.0519 |
| Socio-reproductive system:     |          |        |
| polygynous and promiscuous     | -0.5674  | 0.2450 |
| polygynous                     | 0.4693   | 0.4014 |
| promiscuous                    | 0.1023   | 0.8362 |
| solitary                       | -0.2164  | 0.7688 |
| <b>AICc = 288.20</b>           |          |        |

|                                | Estimate | p-v    |
|--------------------------------|----------|--------|
| (Intercept)                    | -0.8076  | 0.4919 |
| <b>Extrinsic factors</b>       |          |        |
| Mean human footprint           | 0.0580   | 0.0003 |
| <b>Intrinsic Factors</b>       |          |        |
| <u>Ecology</u>                 |          |        |
| Annual range of precipitations | -0.0002  | 0.0025 |
| Mean temperature range         | -0.0048  | 0.0569 |
| Frugivory                      | 0.0158   | 0.0050 |
| Home range (log)               | 0.2963   | 0.0035 |
| <u>Life history</u>            |          |        |
| Gestation                      | 0.0096   | 0.1040 |
| <u>Behaviour</u>               |          |        |
| Mean group size (log)          | -0.3773  | 0.0377 |
| <b>AICc = 288.93</b>           |          |        |

|                          | Estimate | p-v    |
|--------------------------|----------|--------|
| (Intercept)              | 0.4240   | 0.6414 |
| <b>Extrinsic factors</b> |          |        |
| Mean human footprint     | 0.0586   | 0.0003 |
| <b>Intrinsic Factors</b> |          |        |
| <u>Ecology</u>           |          |        |

|                                |         |        |
|--------------------------------|---------|--------|
| Annual range of precipitations | -0.0002 | 0.0019 |
| Mean temperature range         | -0.0051 | 0.0446 |
| Frugivory                      | 0.0156  | 0.0057 |
| Home range (log)               | 0.3407  | 0.0006 |
| <u>Behaviour</u>               |         |        |
| Mean group size (log)          | -0.3548 | 0.0519 |

---

**AICc = 289.44**

|                                | Estimate | p-v    |
|--------------------------------|----------|--------|
| (Intercept)                    | -0.1091  | 0.3593 |
| <b>Extrinsic factors</b>       |          |        |
| Mean human footprint           | 0.0560   | 0.0005 |
| <b>Intrinsic Factors</b>       |          |        |
| <u>Ecology</u>                 |          |        |
| Annual range of precipitations | -0.0002  | 0.0019 |
| Mean temperature range         | -0.0048  | 0.0542 |
| Frugivory                      | 0.0157   | 0.0058 |
| Home range (log)               | 0.2171   | 0.0050 |
| <u>Life history</u>            |          |        |
| Gestation                      | 0.0132   | 0.0426 |
| Female body mass (res)         | 0.2890   | 0.1863 |
| <u>Behaviour</u>               |          |        |
| Mean group size (log)          | -0.3540  | 0.0510 |

---

**AICc = 289.44**

|                                | Estimate | p-v    |
|--------------------------------|----------|--------|
| (Intercept)                    | -0.9326  | 0.4301 |
| <b>Extrinsic factors</b>       |          |        |
| Mean human footprint           | 0.0557   | 0.0004 |
| <b>Intrinsic Factors</b>       |          |        |
| <u>Ecology</u>                 |          |        |
| Annual range of precipitations | -0.0002  | 0.0004 |
| Mean temperature range         | -0.0057  | 0.0241 |
| Frugivory                      | 0.0150   | 0.0059 |
| Home range (log)               | 0.2394   | 0.0315 |
| <u>Life history</u>            |          |        |
| Gestation                      | 0.0139   | 0.0284 |
| Female body mass (res)         | 0.3212   | 0.1575 |
| <u>Behaviour</u>               |          |        |
| Mean group size (log)          | -0.4256  | 0.0474 |
| Sexual dimorphism              | -0.6112  | 0.3127 |
| Socio-reproductive system:     |          |        |
| polygynous and promiscuous     | -0.5291  | 0.2794 |
| polygynous                     | 0.5270   | 0.3487 |
| promiscuous                    | 0.1169   | 0.8132 |
| solitary                       | -0.0829  | 0.9117 |

---

AICc = 289.77
